# Supplementary material for: SEPepQuant enhances the detection of possible isoform regulations in shotgun proteomics
Source: Nat Commun. 2023 Sep 19;14:5809. doi: 10.1038/s41467-023-41558-2 (PMC10509223; doi:10.1038/s41467-023-41558-2)
Supplement: Supplementary file 1 — Supplementary Information [file 41467_2023_41558_MOESM1_ESM.pdf]

# **SEpPepQuant enhances the detection of possible isoform regulations in shotgun proteomics**

*Yongchao Dou<sup>1,2</sup>, Yuejia Liu<sup>3</sup>, Xinpei Yi<sup>1,2</sup>, Lindsey K. Olsen<sup>1,2</sup>, Hongwen Zhu<sup>4</sup>, Qiang Gao<sup>5</sup>, Hu Zhou<sup>3,4</sup>, Bing Zhang<sup>1,2#</sup>*

<sup>1</sup>Lester and Sue Smith Breast Center, Baylor College of Medicine, Houston, TX 77030, USA

<sup>2</sup>Department of Molecular and Human Genetics, Baylor College of Medicine, Houston, TX 77030, USA

<sup>3</sup>School of Chinese Materia Medica, Nanjing University of Chinese Medicine, 138 Xianlin Avenue, Nanjing, Jiangsu 210023, China

<sup>4</sup>Department of Analytical Chemistry, State Key Laboratory of Drug Research and CAS Key Laboratory of Receptor Research, Shanghai Institute of Materia Medica, Chinese Academy of Sciences, 555 Zuchongzhi Road, Shanghai 201203, China

<sup>5</sup>Department of Liver Surgery and Transplantation, Liver Cancer Institute, Zhongshan Hospital, Fudan University, and Key Laboratory of Carcinogenesis and Cancer Invasion of Ministry of Education, 180 Fenglin Road, Shanghai 200032, China

# Correspondence should be addressed to B.Z. ([bing.zhang@bcm.edu](mailto:bing.zhang@bcm.edu))

## Supplementary Information

Supplemental figure 1: Summary of existing methods and classification of the *in silico* digested peptides with 1 or 2 miscleavages or semi-tryptic peptides.

Supplemental figure 2: SEPEP level quality control

Supplemental figure 3: Evaluation of SEPEPQuant on an iPSC data set

Supplemental figure 4: Evaluation of SEPEPQuant on two liver cancer data sets

Supplementary Dataset 1: Percentage of peptides with missed cleavage site(s)

Supplementary Dataset 2: iPSC-TMT SEPEP quantification, median centered

Supplementary Dataset 3: iPSC-TMT SEPEP mapping table

Supplementary Dataset 4: iPSC-FragPipe quantification

Supplementary Dataset 5: HCC-TMT SEPEP quantification, median centered

Supplementary Dataset 6: HCC-TMT SEPEP mapping table

Supplementary Dataset 7: HCC-TMT FragPipe quantification

Supplementary Dataset 8: HCC-label free SEPEP PSM count

Supplementary Dataset 9: HCC-label free SEPEP mapping table

Supplementary Dataset 10: HCC-label free FragPipe quantification

Supplementary Dataset 11: iPSC-TMT gene and SEPEP correlation with culture time

Supplementary Dataset 12: HCC-TMT gene and SEPEP tumor versus normal comparison

Supplementary Dataset 13: HCC-TMT gene and SEPEP survival analysis

Supplementary Dataset 14: Overlapping significant genes from the HCC-TMT tumor versus normal and survival analyses, as well as information and results from the PRM analysis.

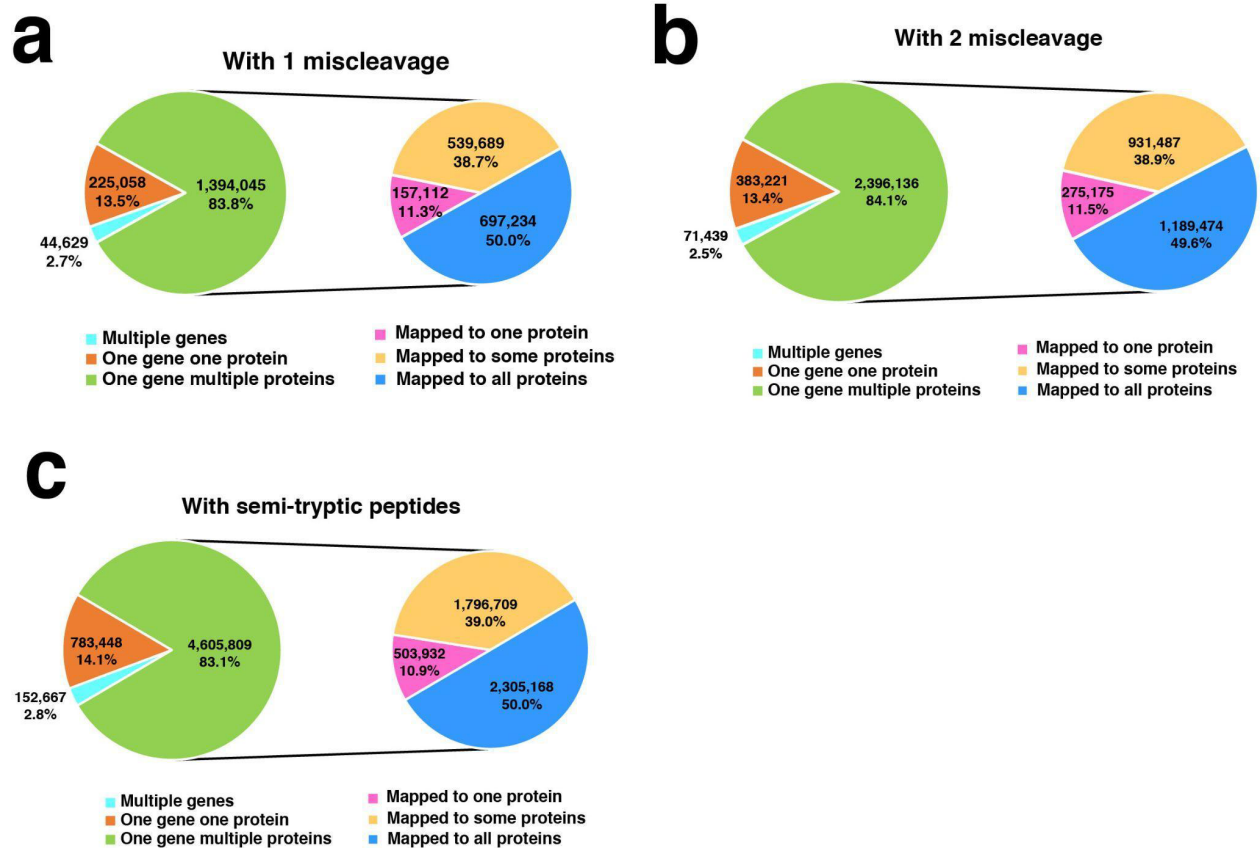

**Supplemental Figure 1.** Classification of the *in silico* digested peptides with 1 (a) and 2 (b) miscleavages and semi-tryptic peptides (c) based on their mapping to genes and protein isoforms.

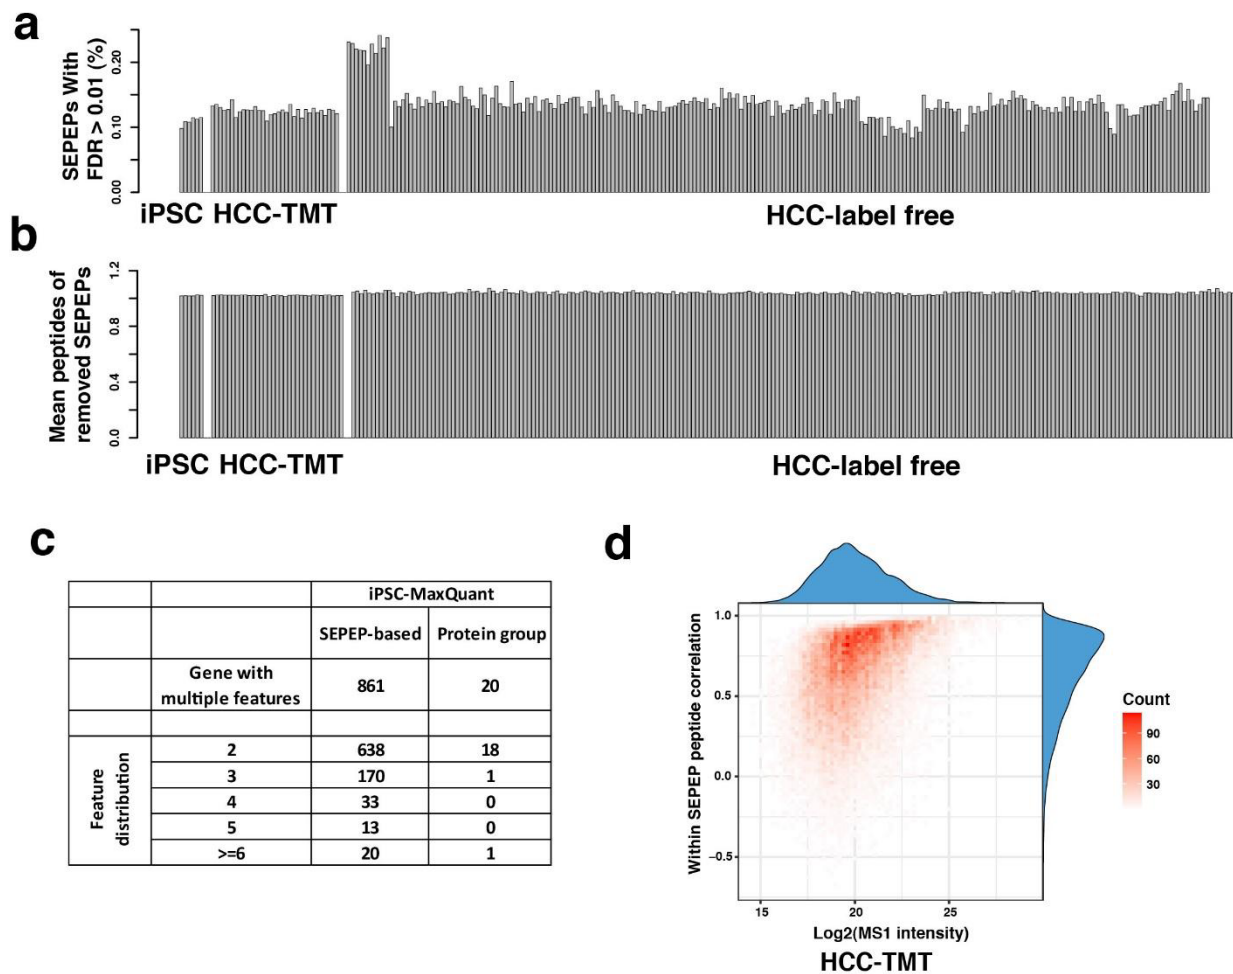

**Supplemental figure 2: SEPEP level quality control.** (a) Percentages of SEPEPs with FDR >0.01. (b) Mean peptide numbers of SEPEPs with FDR >0.01. (c) Comparison of numbers of genes with multiple SEPEPs in SEPEPQuant analysis and those with multiple protein groups by MaxQuant. (d) A density plot showing the distribution of within-SEPEP peptide correlations and their relationship with average MS1 peptide intensities. Source data of s2a, s2b, and s2d are provided as a Source Data file.

**a**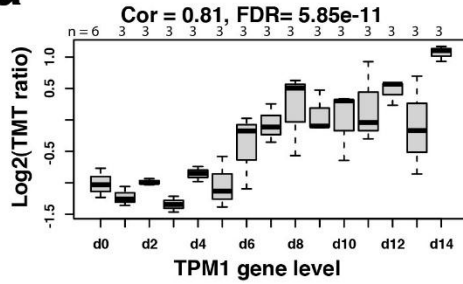**b**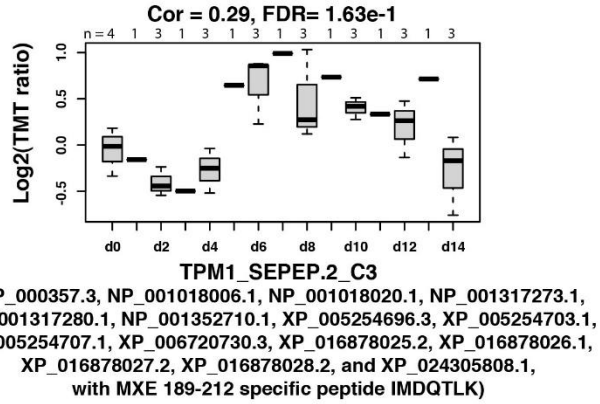**c**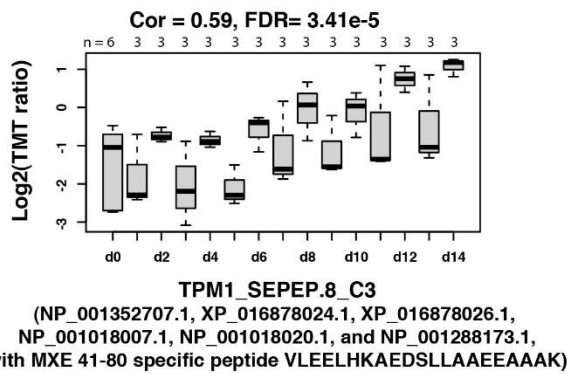**f**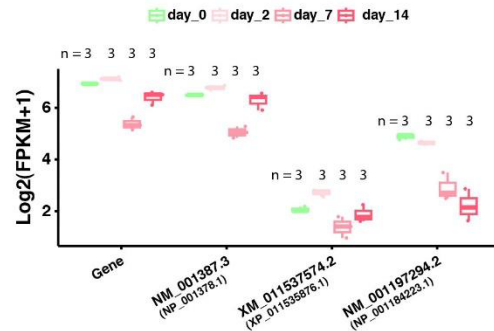**d**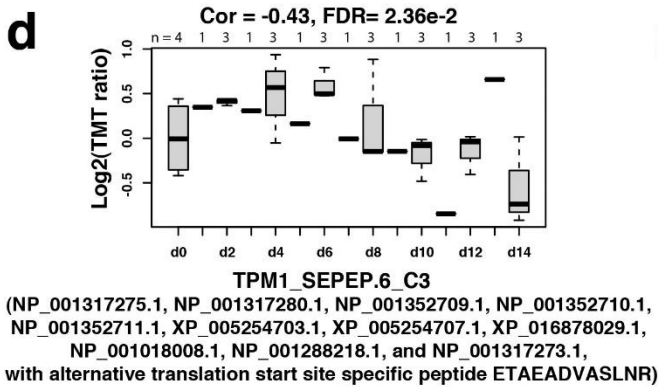**g**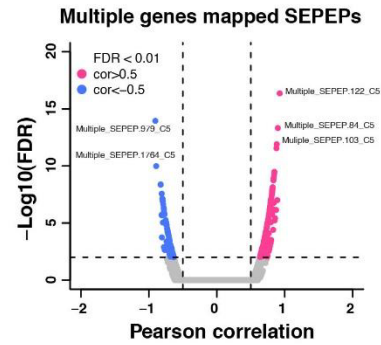**e**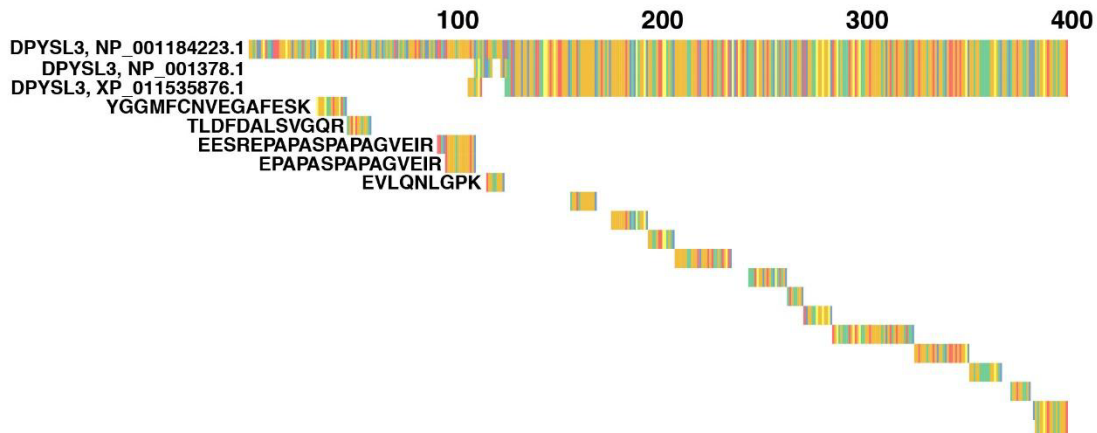

**Supplemental figure 3: Evaluation of SEPEPQuant on an iPSC data set.** (a-d) Protein abundance and culture time correlations of TPM1 gene and selected SEPEPs. (e) Identified peptides of DPYSL3 on iPSC data set from 1- 400bp. (f) Gene and transcript isoform expression of DPYSL3 in RNASeq data. (g) Correlations between cell culture time and multi-genes SEPEPs. The p-values were calculated using Pearson's Correlation and the Benjamini and Hochberg method was used to adjust p-values for multiple comparisons. For boxplots, centerline indicates the median, box limits indicate upper and lower quartiles, whiskers indicate the 1.5 interquartile range. Source data of s3a, s3b, s3c, s3d, s3f, and s3g are provided as a Source Data file.

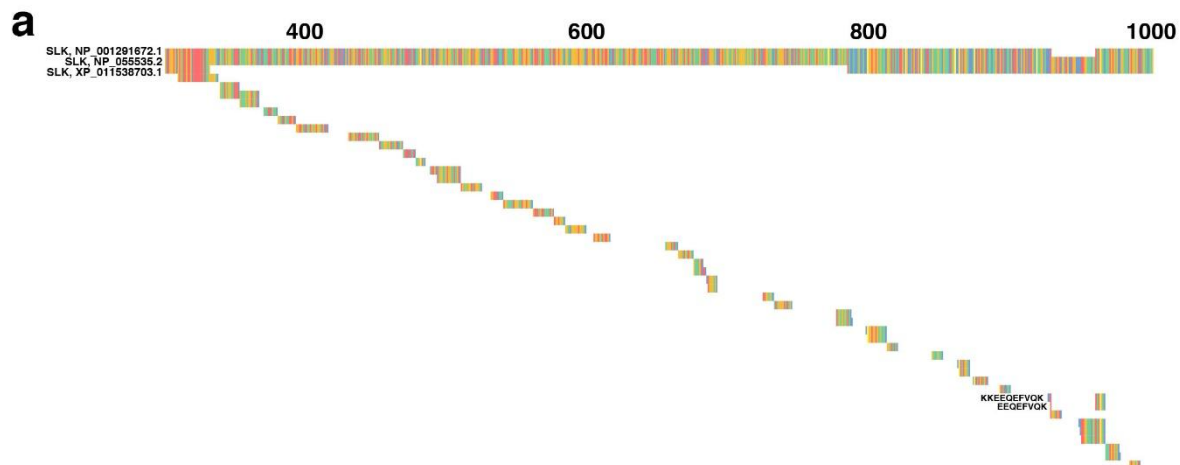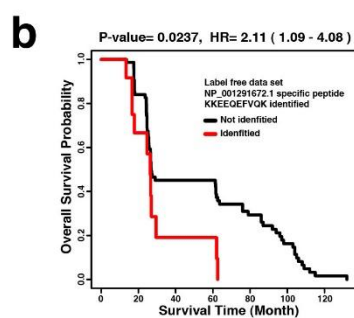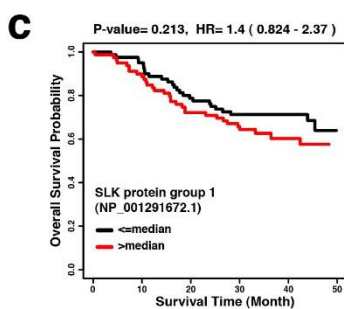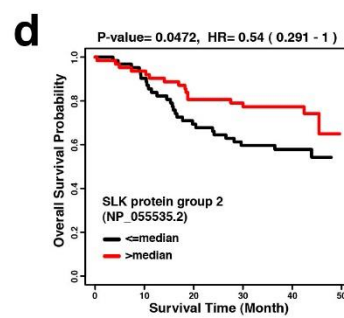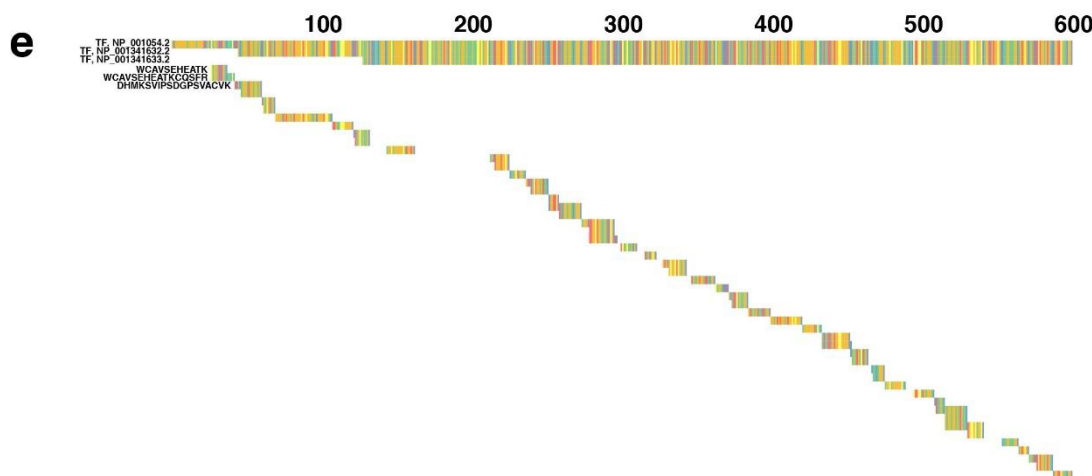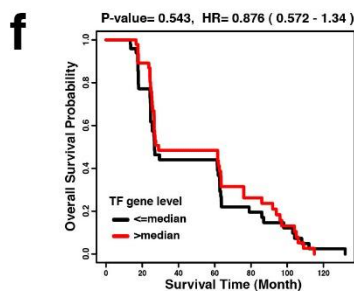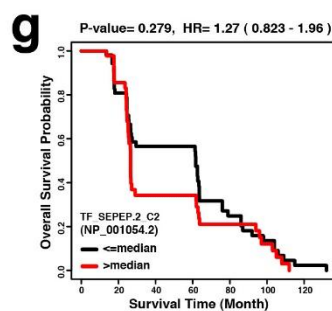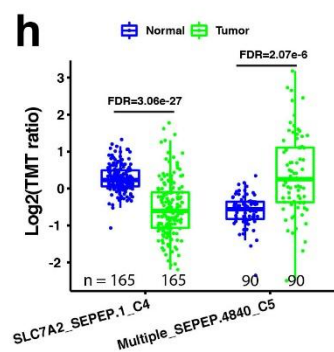

**Supplemental figure 4: Evaluation of SE PepQuant on two liver cancer data sets.** (a) Identified peptides of SLK on HCC-TMT data set. (b) Survival comparison between samples with and without NP\_001291672.1 specific peptide KKEEQEFVQK on HCC-label free data set. (c) Correlation of NP\_001291672.1 abundance by FragPipe and survival on HCC-TMT data set. (d) Correlation of NP\_055535.2 abundance by FragPipe and survival on HCC-TMT data set. (e) Identified peptides of TF on HCC-TMT data set. (f-g) TF gene level and TF\_SEPEP.2\_C2 abundance and survival correlations on HCC-label free data set. (h) Tumor versus normal comparisons based on Multiple\_SEPEP.4840\_C5 and SLC7A2\_SEPEP.1\_C4 abundance, respectively. For boxplots, p-values were calculated using two-sided Student's t-test, the Benjamini and Hochberg method was used to adjust p-values for multiple comparisons, centerline indicates the median, box limits indicate upper and lower quartiles, whiskers indicate the 1.5 interquartile range. For survival analysis, p-values were calculated using Kaplan-Meier test. Source data of s4b, s4c, s4d, s4f, s4g, and s4h are provided as a Source Data file.
